# Supplementary material for: Comparative Genomics of Vancomycin-Resistant Staphylococcus aureus Strains and Their Positions within the Clade Most Commonly Associated with Methicillin-Resistant S. aureus Hospital-Acquired Infection in the United States
Source: PubMed Central journal article supplement — mBio. 2012 May 22;3(3):e00112-12. doi: 10.1128/mBio.00112-12 (PMC3372964; doi:10.1128/mbio.00112-12), 2012-05-22
Supplement: mbo003121277sf04.pdf [file mbo003121277sf04.pdf]

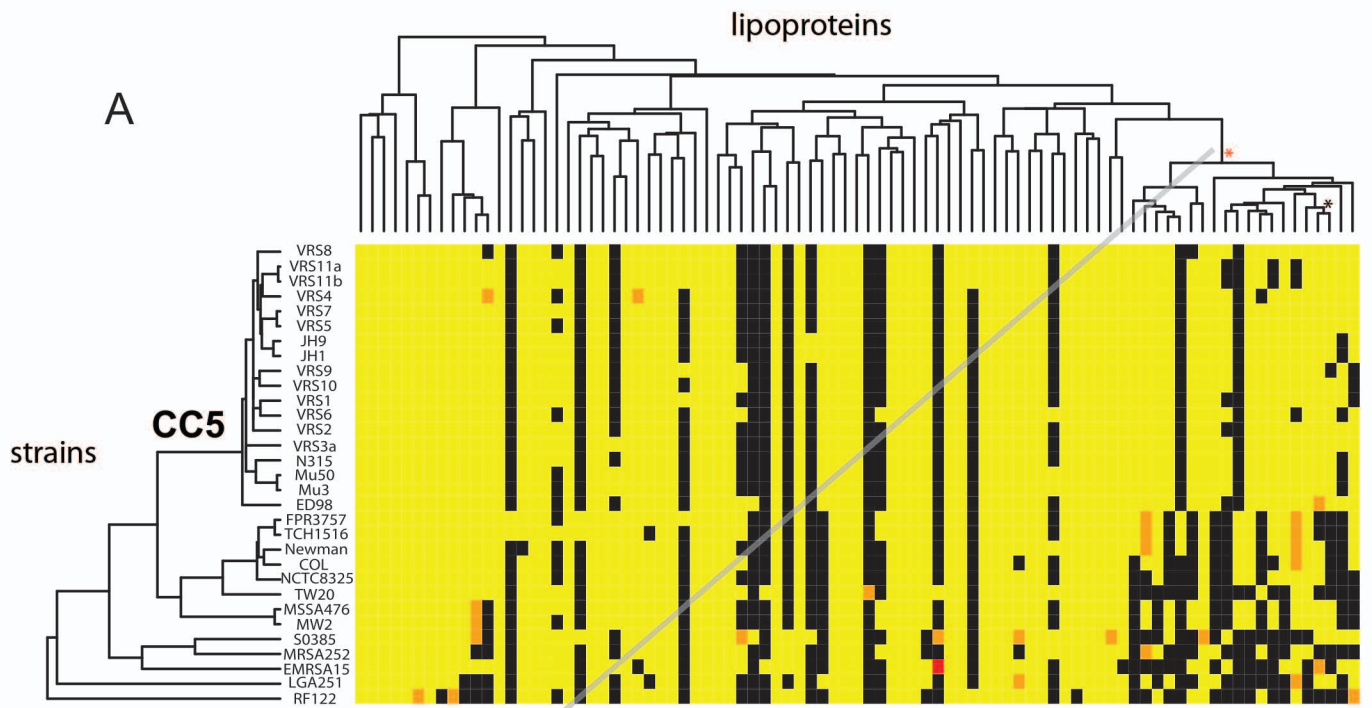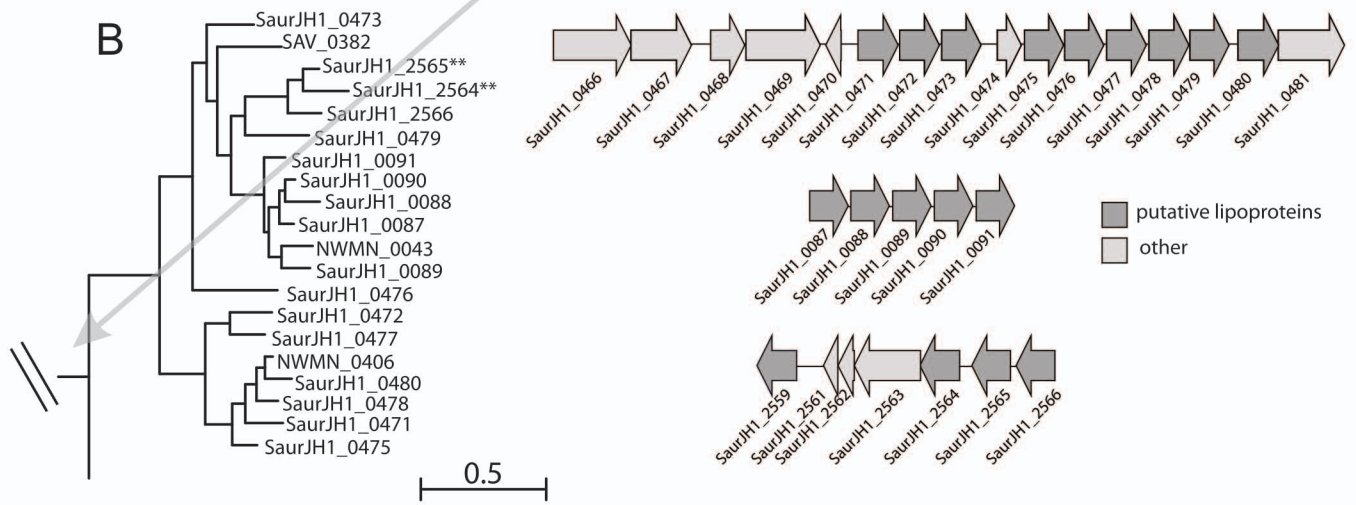

**C**

Potential Pheromones Produced by all North American CC5 strains

| Locus (position of signal) | Signal Sequence          | Locus (position of signal)        | Signal Sequence         |
|----------------------------|--------------------------|-----------------------------------|-------------------------|
| SaurJH1_0087 (1-24)        | MMKRLNKLVLGIIFLFLVISITAG | SaurJH1_1143 (1-19)               | MSKFKSLLLLFGTLILLSSG    |
| SaurJH1_0089 (1-23)        | MKRLNTLVLYISFLLIISIVAG   | SaurJH1_1174 (1-19)               | MKFGKTIADVGLASSVLLAG    |
| SaurJH1_0090 (1-23)        | MKRLNKLVLGIFLFLVISITAG   | SaurJH1_1214 (1-19)               | MRIKYTLTILVISVVILTS     |
| SaurJH1_0091 (1-23)        | MKRLNKLVLVISFLLIIVISFTAG | SaurJH1_1297 (1-18)               | MKKTGLGCLLIMLLVVAG      |
| SaurJH1_0106 (1-20)        | MNKVIKMLVVTLAFLLVLAG     | SaurJH1_1479 (1-20)               | MKKWQFVGTALGATLLGA      |
| SaurJH1_0134 (1-20)        | MKNFKYLFVLM LAVIVFAAA    | SaurJH1_1575 (1-17)               | MFKRKILILIATIIILSG      |
| SaurJH1_0199 (1-18)        | MKKIISTAIIVLALVLSG       | SaurJH1_1576 (1-17)               | MFKRKILILIATIIILSG      |
| SaurJH1_0205 (1-20)        | MSKILKCTILAVVMLLIVTA     | SaurJH1_1578 (1-17)               | MKKFIGSVLATTLLILGG      |
| SaurJH1_0215 (1-17)        | MKSKIYIILLFLIFLSS        | SaurJH1_1622 (1-16)               | MKKLVSVIGATLLLAG        |
| SaurJH1_0293 (1-18)        | MMKRILVVFLMLAILAG        | SaurJH1_1884 (1-24)               | MKKFLKFKGMKICMLYLLIFLSS |
| SaurJH1_0401 (1-17)        | MKKLTTLLLASTLLIAA        | SaurJH1_1887 (1-18)               | MKFKAIVAITLSFSLTAA      |
| SaurJH1_0431 (1-18)        | MKLSLAVLSMSAVLTA         | SaurJH1_1909 (1-17)               | MRRLLSLLLASTMILVA       |
| SaurJH1_0437 (1-19)        | MKKRLLSTFLASALITG        | SaurJH1_1928 (1-20)               | MKMINKLIVPVTASALLLGA    |
| SaurJH1_0471 (1-22)        | MRYLKRLSWYISILILIVVIAG   | SaurJH1_1992 (1-17)               | MKRTLVLITAIIFILAA       |
| SaurJH1_0472 (1-22)        | MGYLKKLALFISVILGIFIIG    | SaurJH1_2165 (1-19)               | MKKKALLPLFLGIMVFLAG     |
| SaurJH1_0473 (1-22)        | MGYSKRFALYISILILIVMAG    | SaurJH1_2165 (1-19)               | MKKKALLPLFLGIMVFLAG     |
| SaurJH1_0475 (1-22)        | MRDSKRVVLYISIMVLSIFIIG   | SaurJH1_2246 (1-21)               | MRGLKTFISILGLIVALLVAA   |
| SaurJH1_0476 (1-22)        | MGYSKRFALYISILILIVMAG    | SaurJH1_2346 (1-19)               | MKMKRFIAIVMALFLVLAG     |
| SaurJH1_0477 (1-22)        | MGYLKRLVLYIVIMVMSVFIIG   | SaurJH1_2351 (1-17)               | MKLLLLPLIIMLLVLA        |
| SaurJH1_0478 (1-22)        | MGYFKRVVLYIIVMVSVFIIG    | SaurJH1_2438 (1-17)               | MKRLVTGLLALSFLAA        |
| SaurJH1_0479 (1-22)        | MKSIKRIGLCISLLIIFATS     | SaurJH1_2453 (1-20)               | MKRLTKMSAMLLASGLITG     |
| SaurJH1_0480 (1-22)        | MEYIKKIALYMSVLLLIIFIGG   | SaurJH1_2478 (1-20)               | MKKKLGMLLLVPVATLSLAA    |
| SaurJH1_0498 (1-17)        | MKRLIGLVIVALVLA          | SaurJH1_2482 (1-18)               | MKKLPLTIVFVMSLLILTA     |
| SaurJH1_0647 (1-18)        | MKKSIAFIILFIMLVLSG       | SaurJH1_2483 (1-17)               | MKRFVATVLLLLVFIISG      |
| SaurJH1_0669 (1-17)        | MKLVPLLLALLLVVAA         | SaurJH1_2487 (1-17)               | MKRLFLVMIASFVFIILAA     |
| SaurJH1_0717 (1-17)        | MKLIISIMAVMLFLTG         | SaurJH1_2521 (1-20)               | MKKIKYILVVVFLSLTVLSG    |
| SaurJH1_0748 (1-20)        | MNTKYFLAVGAVASVLTGGA     | SaurJH1_2534 (1-20)               | MKKLCSLIVVALICIIALSA    |
| SaurJH1_0777 (1-18)        | MKKTVLYLVLVAVMFLAA       | SaurJH1_2566 (1-23)               | MMIHSRKLRLWLYLVLLAVFIGA |
| SaurJH1_0781 (1-19)        | MKKIVIAVLAALLFVVISA      | SaurJH1_2762 (1-20)               | MHKYLLFFLLLSVALLYIS     |
| SaurJH1_0825 (1-17)        | MKKVMGILLASTLILGA        | SaurJH1_2827 (1-16)               | MKKLIFLIAIALVLVA        |
| SaurJH1_0856 (1-19)        | MKKLFLILVLTFFAVLLAA      | SAV_0382 (1-16) <sup>†</sup>      | MCVVYRTSVLTLASG         |
| SaurJH1_1008 (1-20)        | MTRKFRTLILILIIATIALSG    | SaurJH1_1042 (1-17) <sup>††</sup> | MKRLGLTLASALVLAG        |
| SaurJH1_1009 (1-20)        | MGKLIKYSIILLIVVLVLSA     | VRA015 (1-16) <sup>‡</sup>        | MKKLLTIVILFTLVLAG       |
| SaurJH1_1119 (1-21)        | MNRNIVKLVVFMILLIVVAVAG   |                                   |                         |

<sup>†</sup> Found in all VRSA excluding VRS6, not annotated in CC5 genomes other than ED98, and present in ST398 and EMRSA15.

<sup>††</sup> Orthogroup analysis suggested that this lipoprotein was present only in the JH1, JH9 and ST398 genomes.

<sup>‡</sup> Present in strains carrying the plasmid pSK41.
