# Supplementary figures and images for: Comparative Genomics of Vancomycin-Resistant Staphylococcus aureus Strains and Their Positions within the Clade Most Commonly Associated with Methicillin-Resistant S. aureus Hospital-Acquired Infection in the United States
Source: PubMed Central journal article supplement — mBio. 2012 May 22;3(3):e00112-12. doi: 10.1128/mBio.00112-12 (PMC3372964; doi:10.1128/mbio.00112-12), 2012-05-22

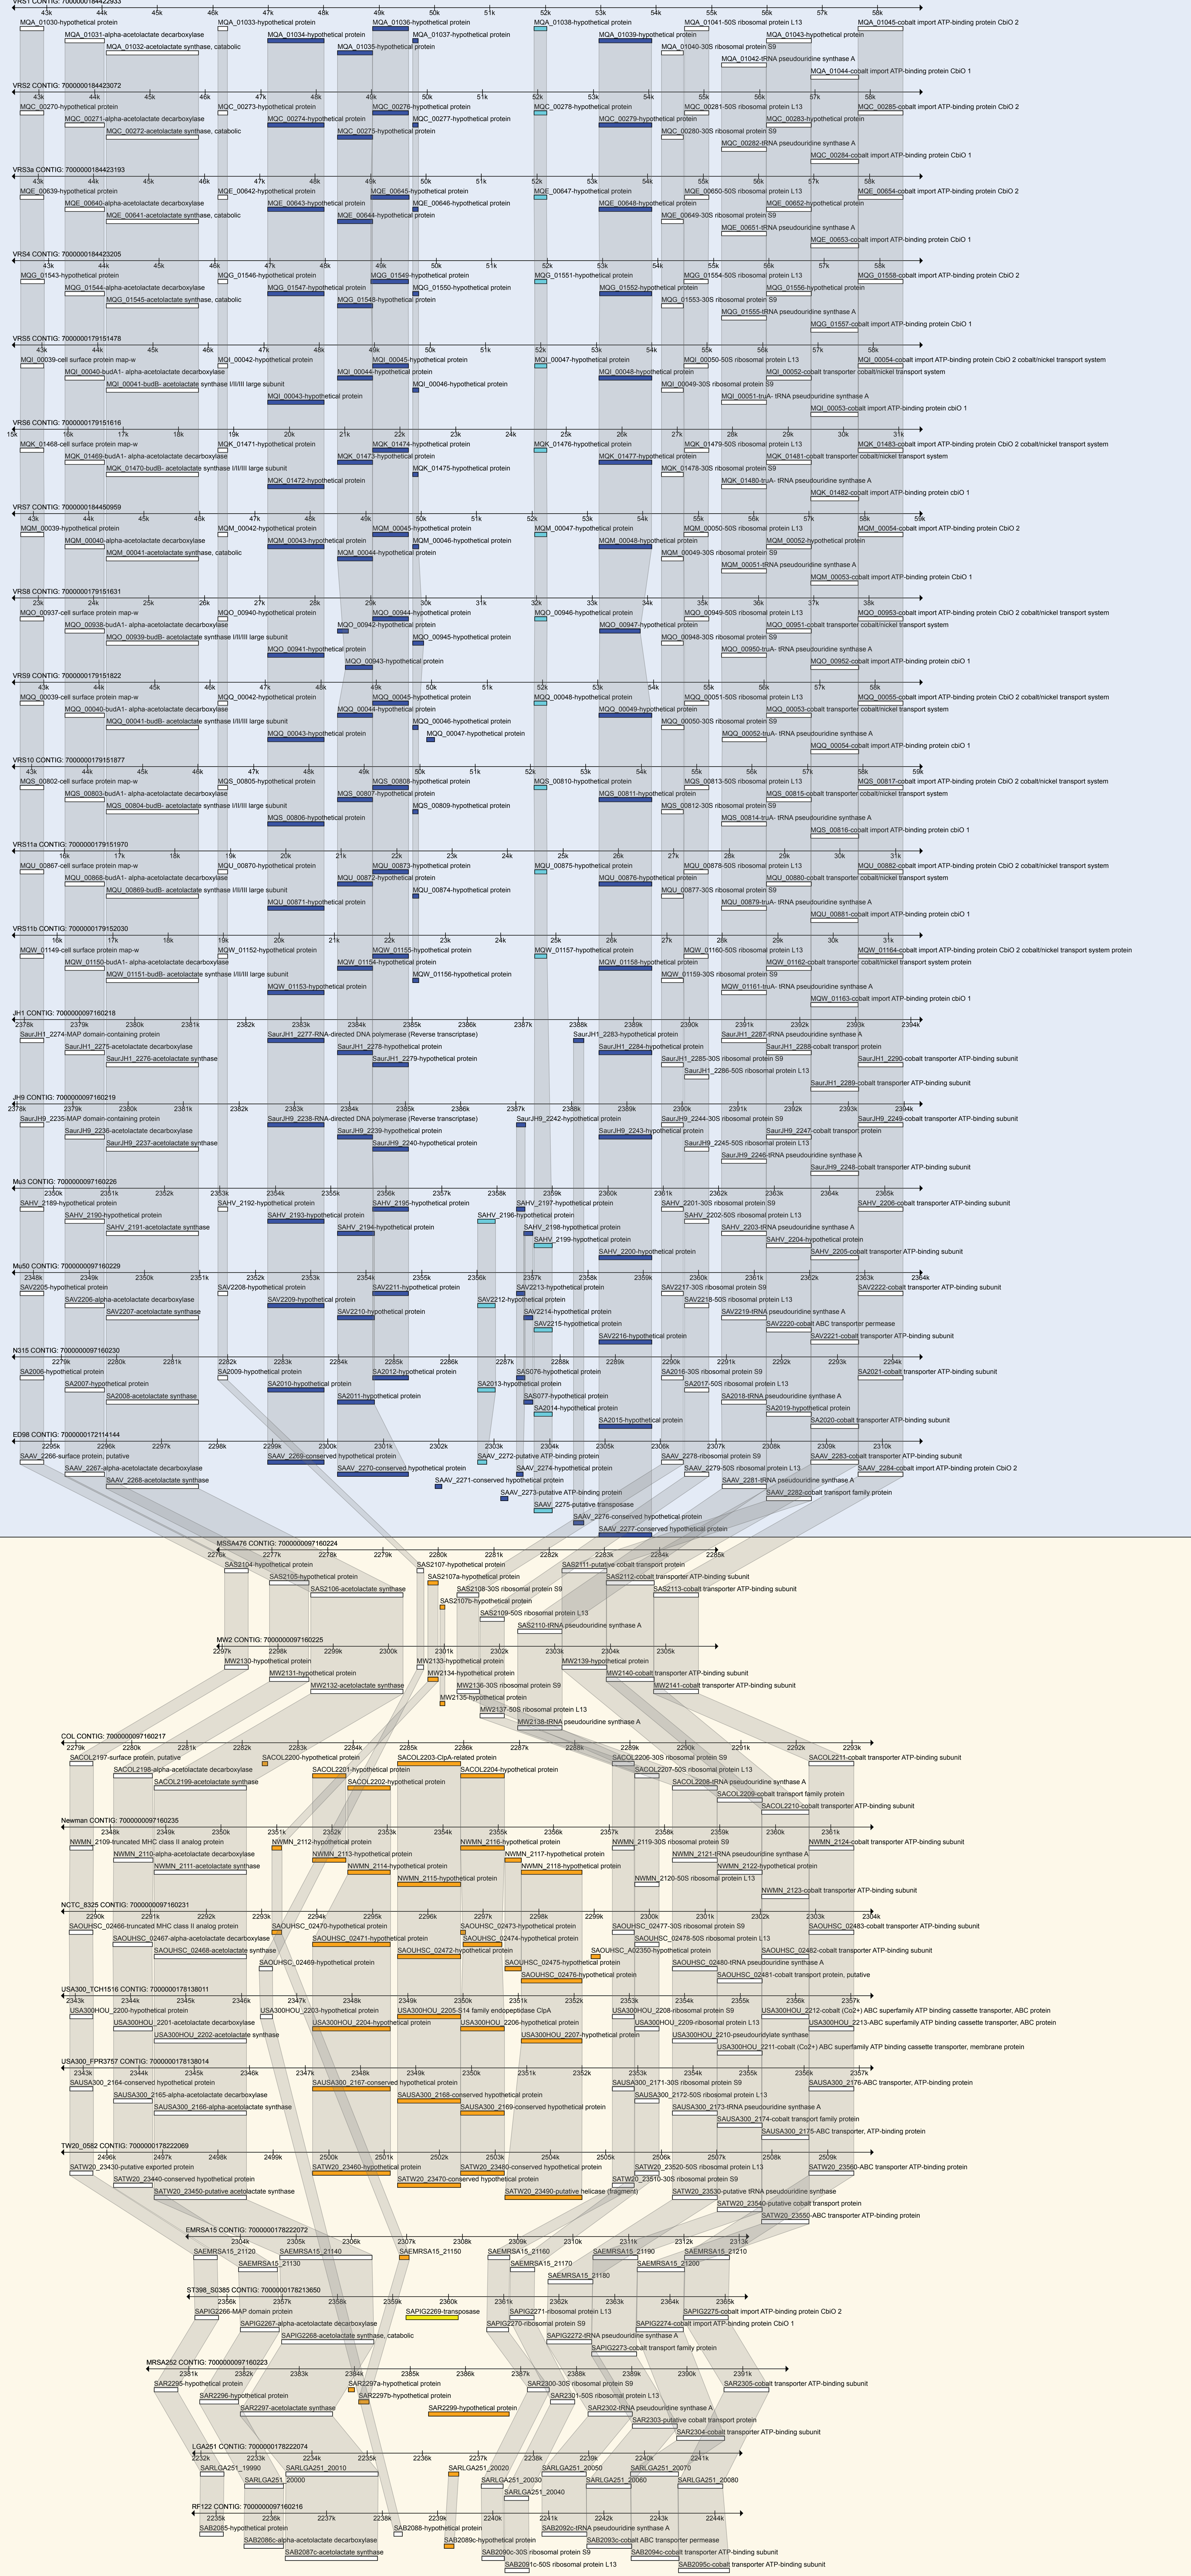

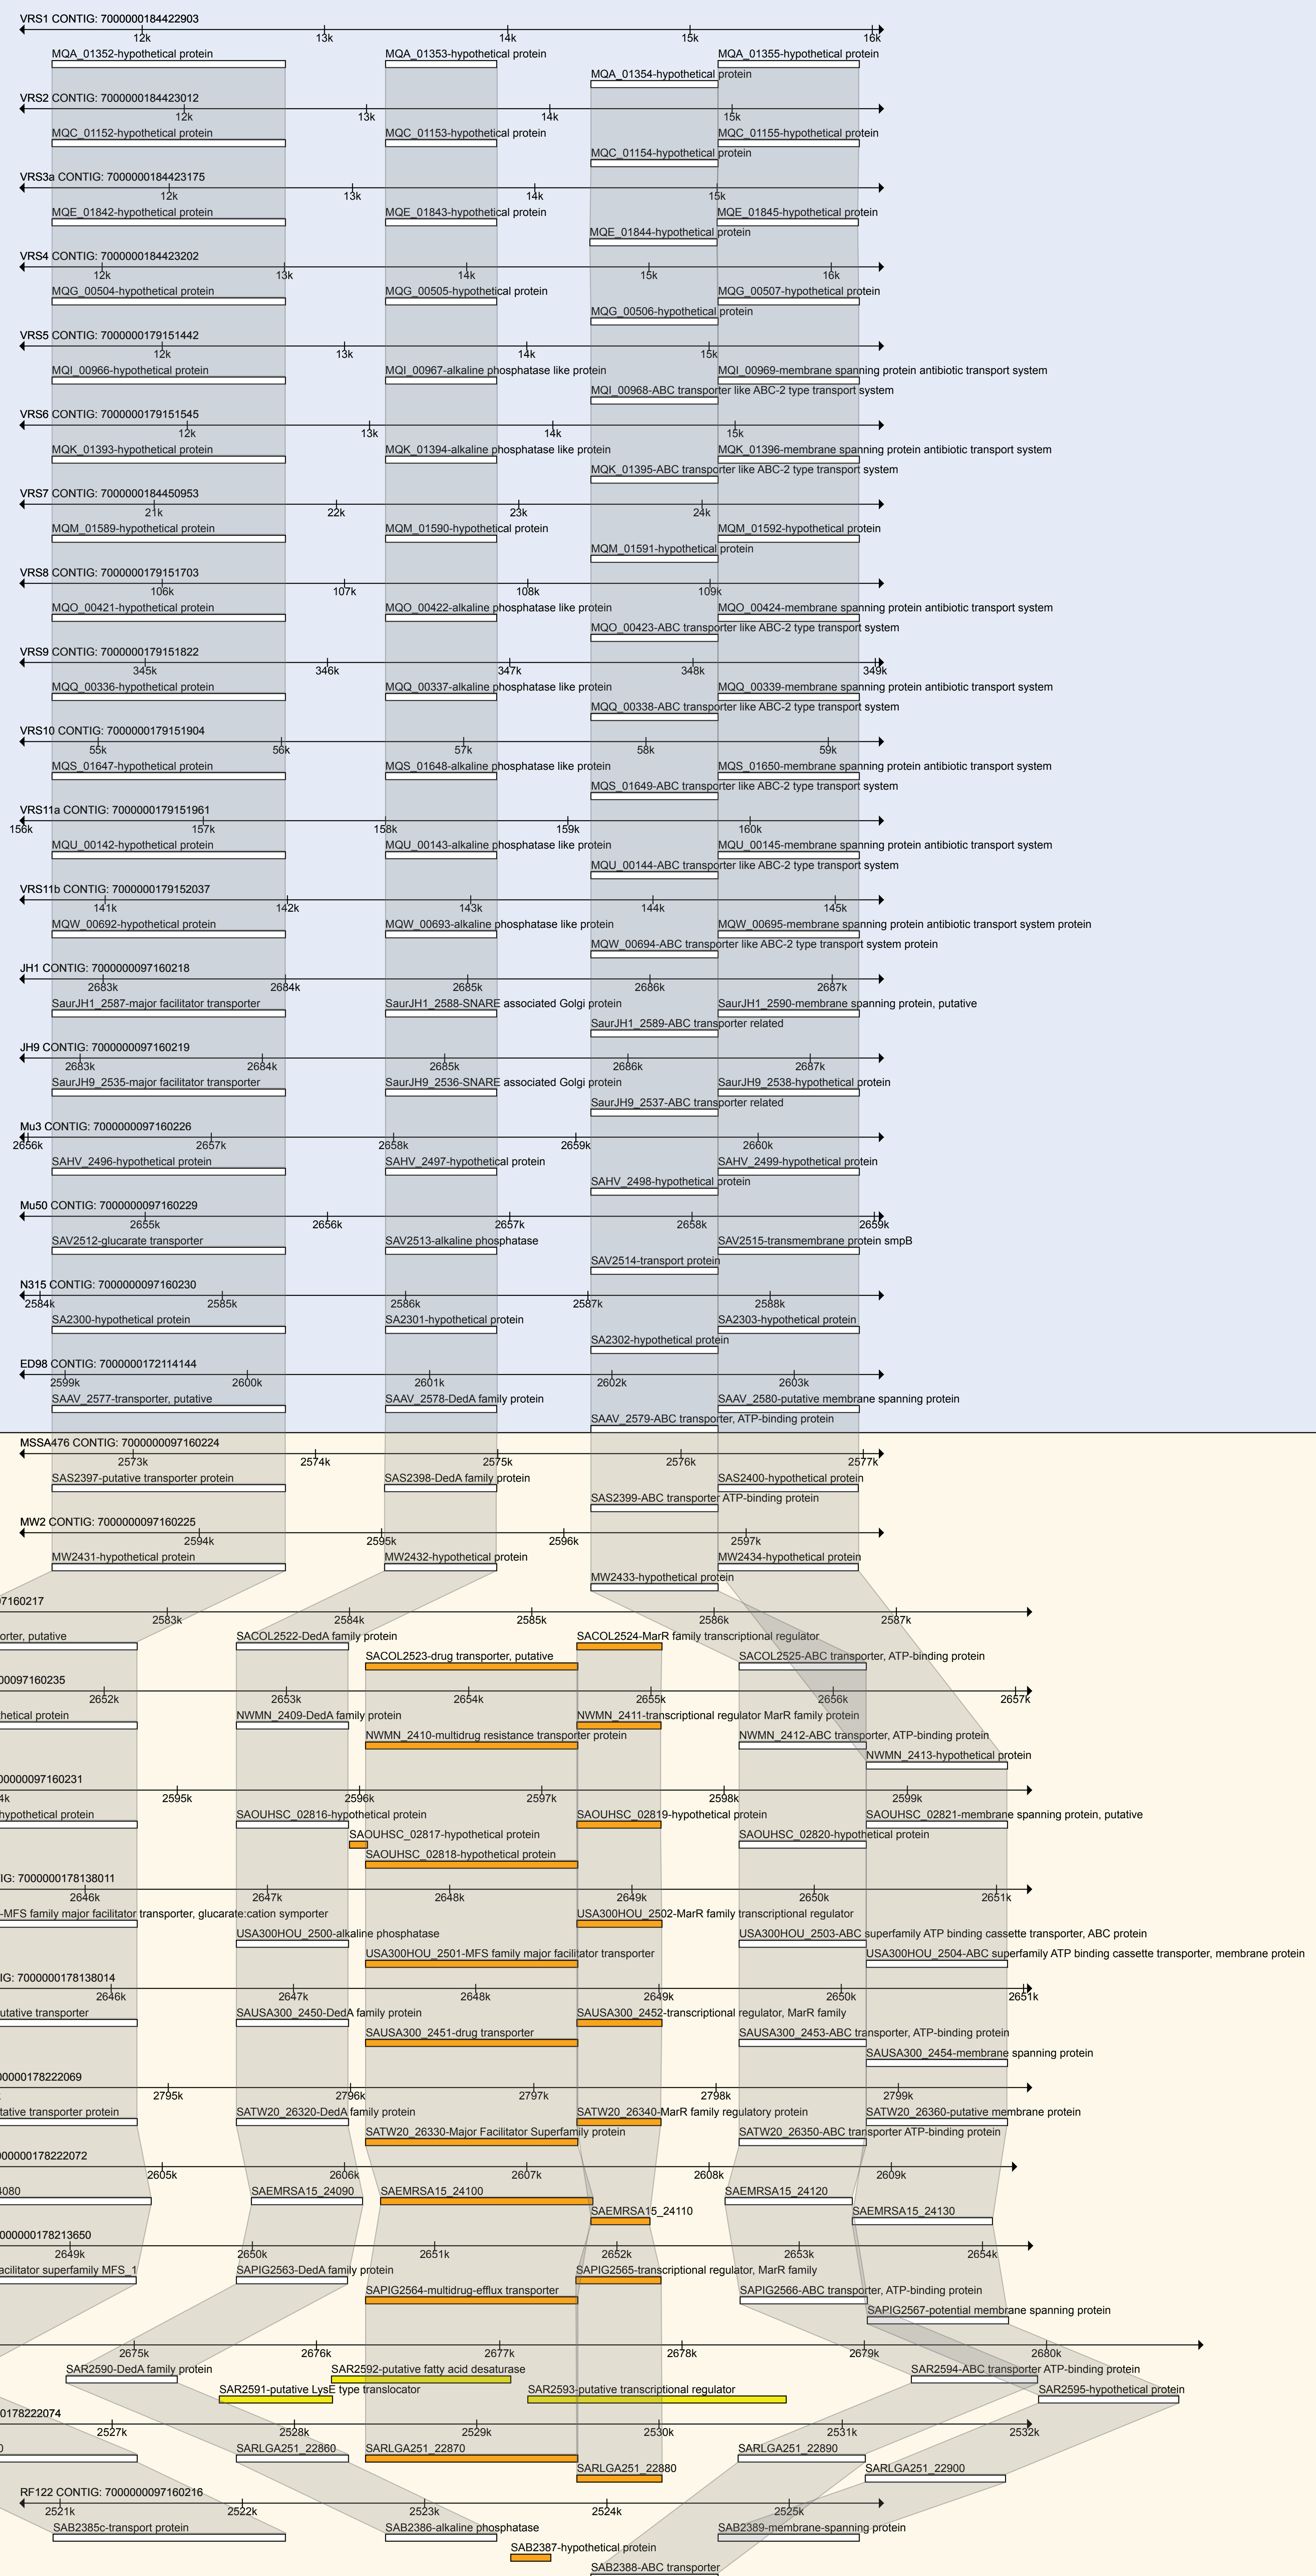

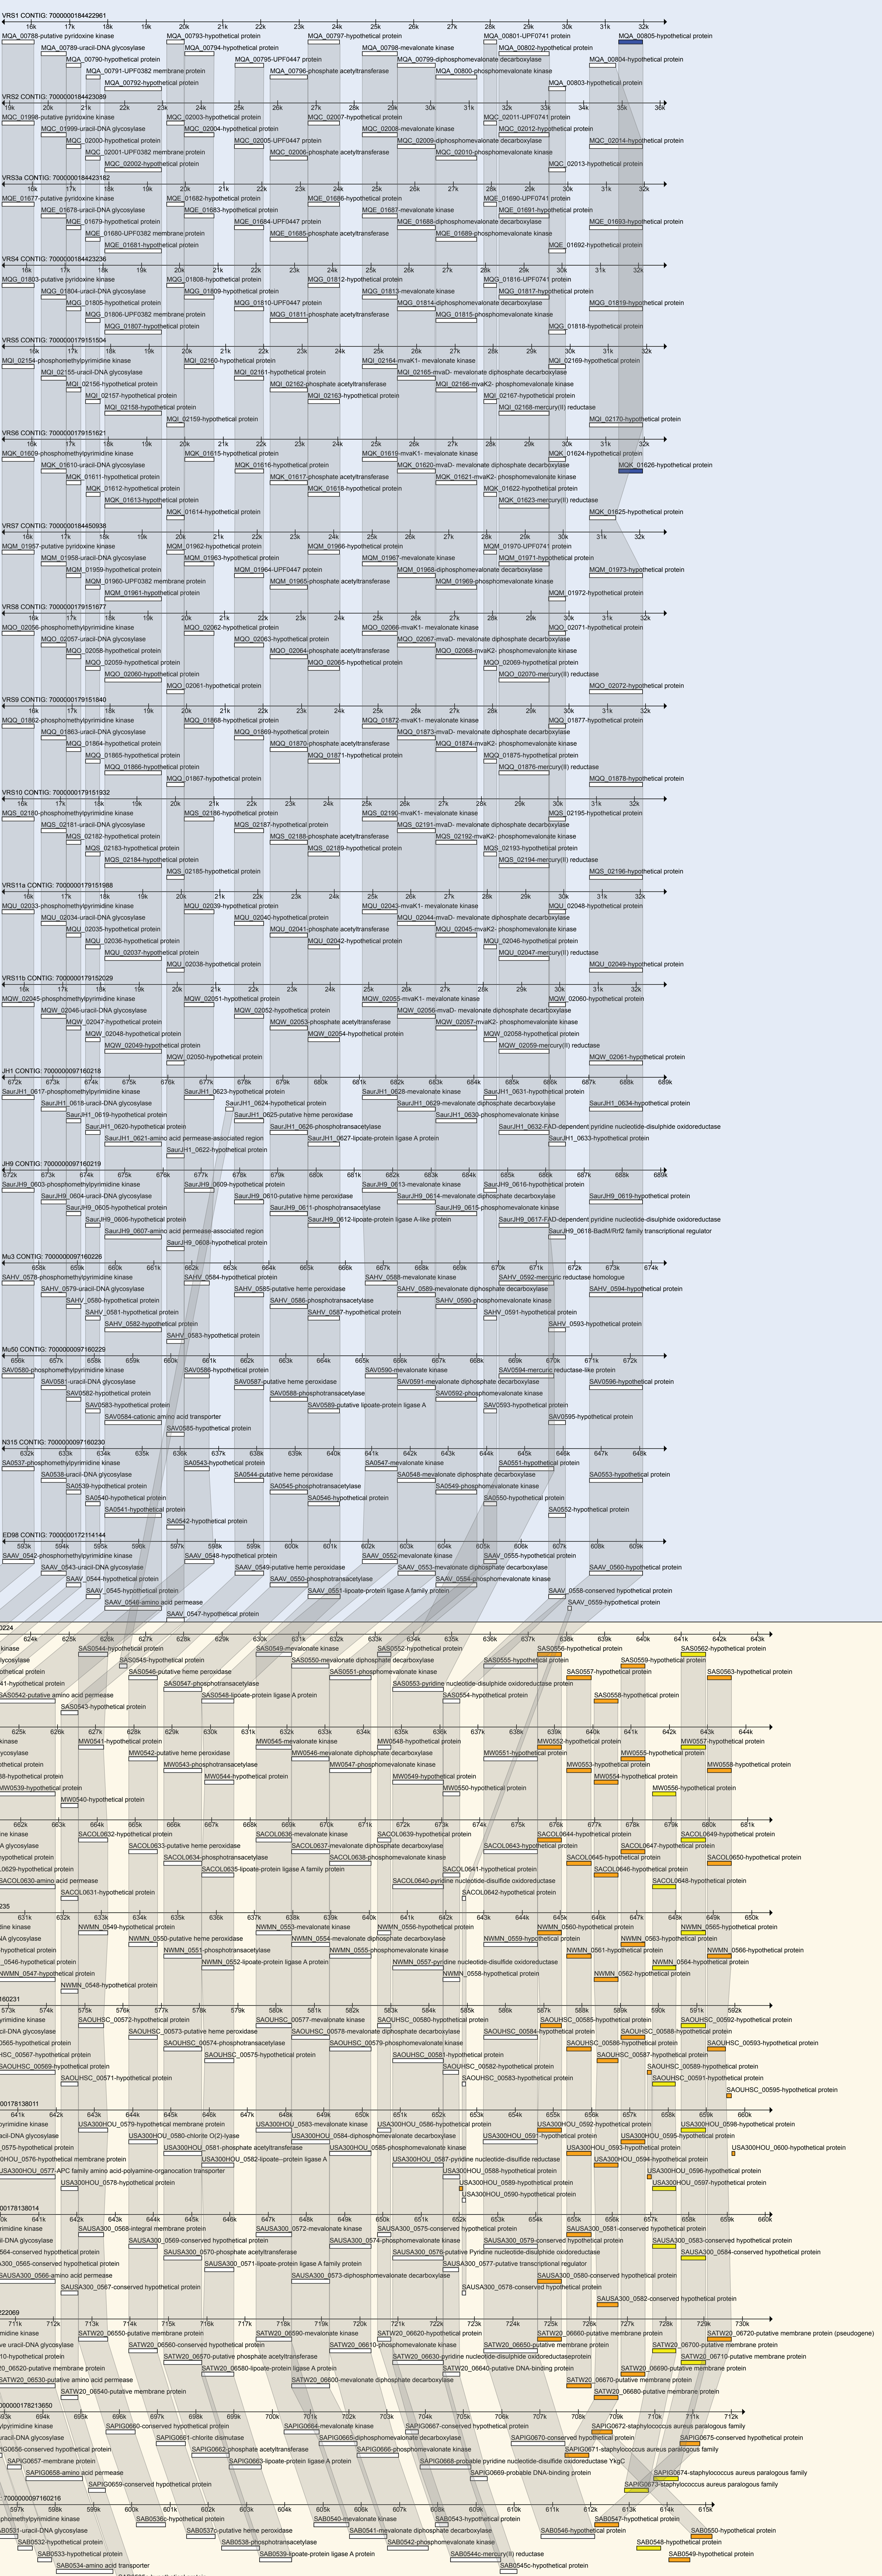



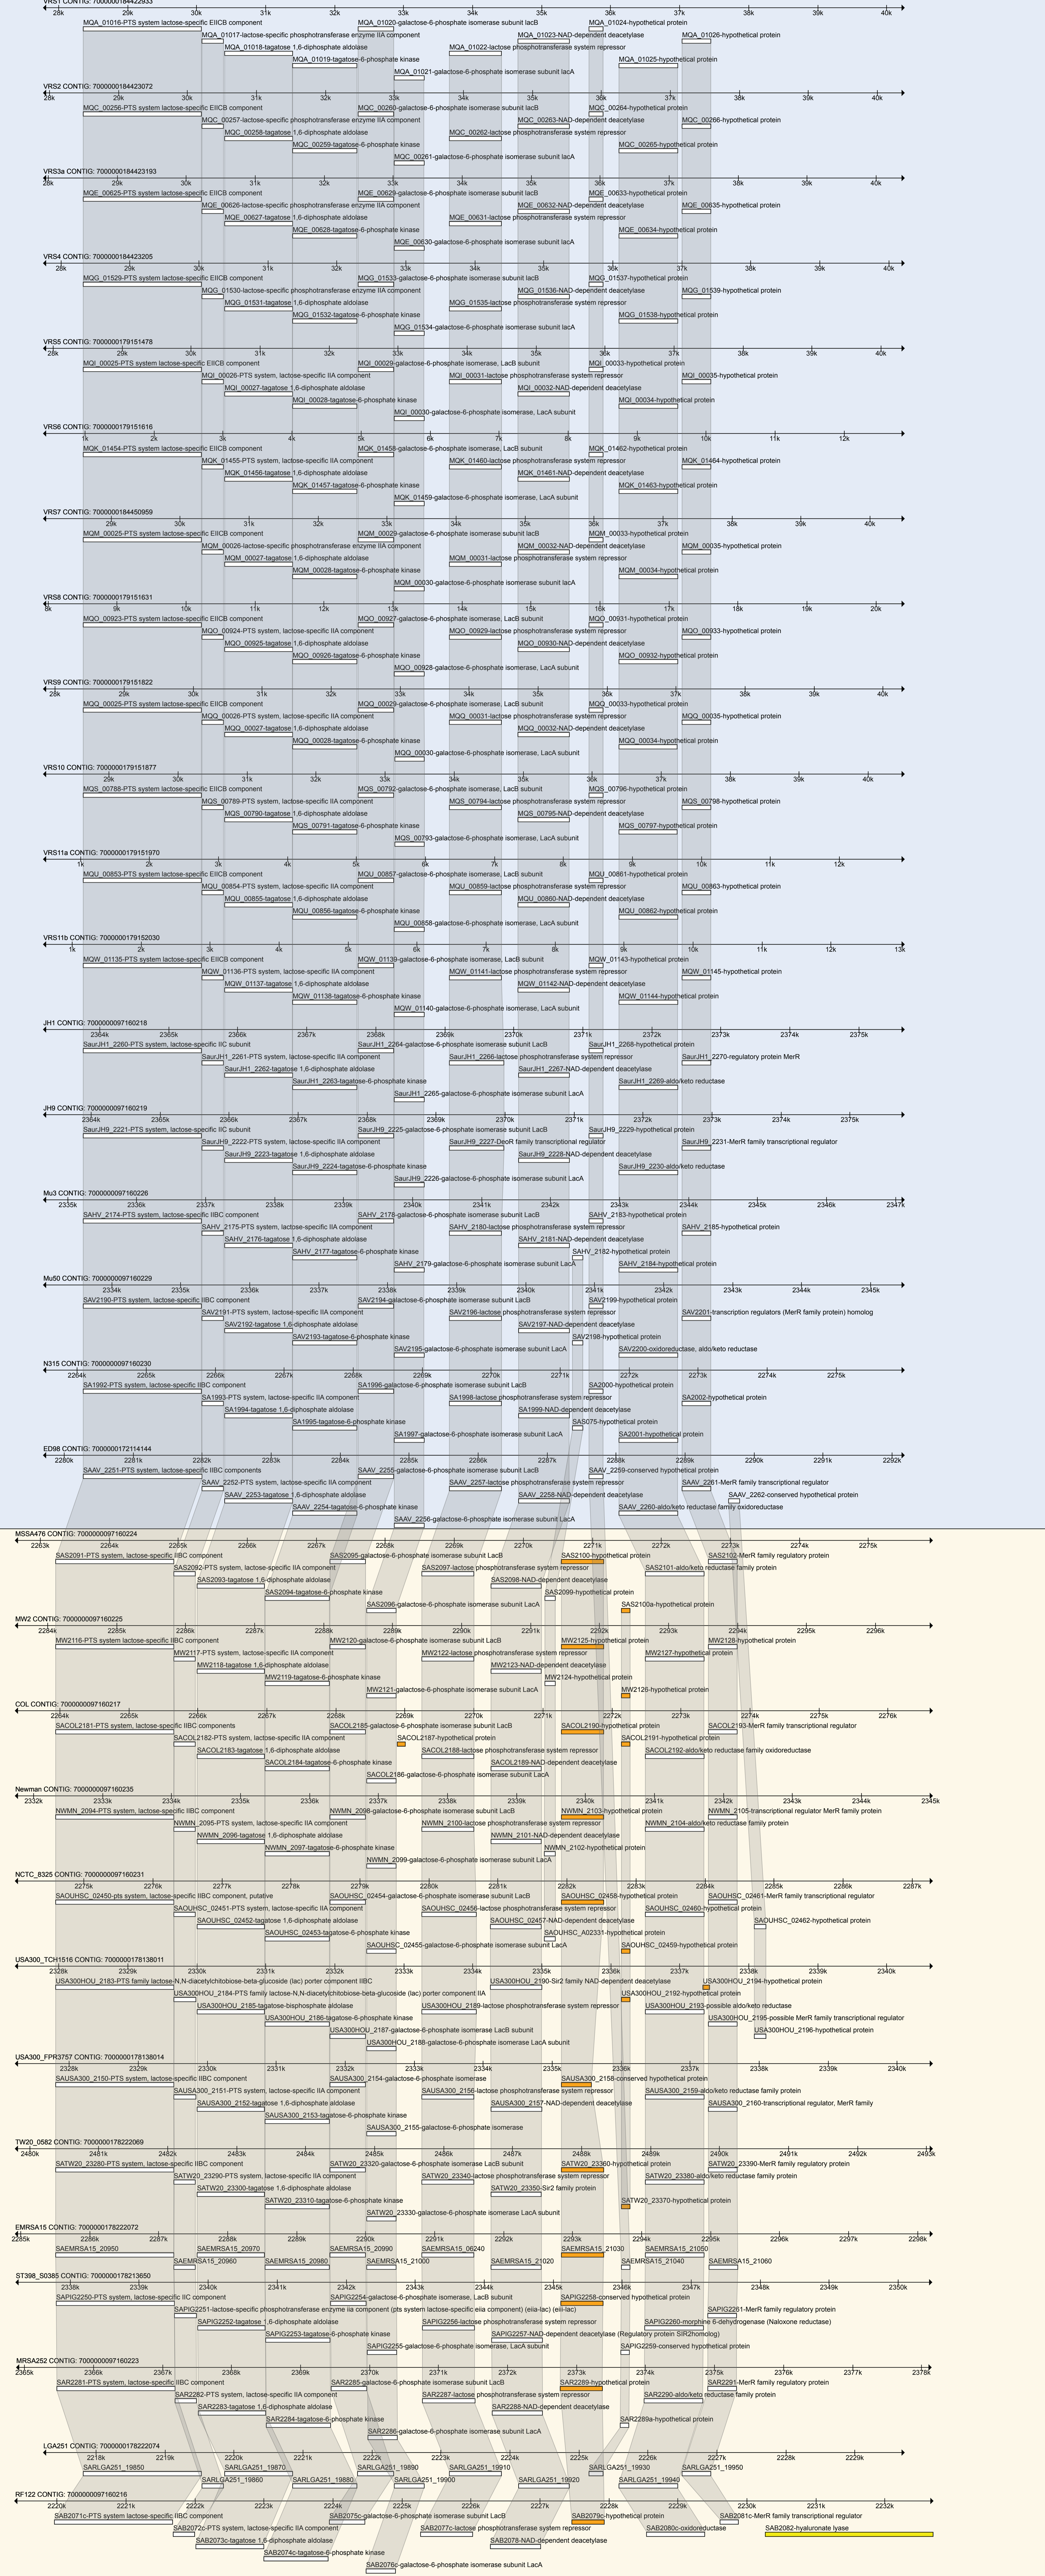

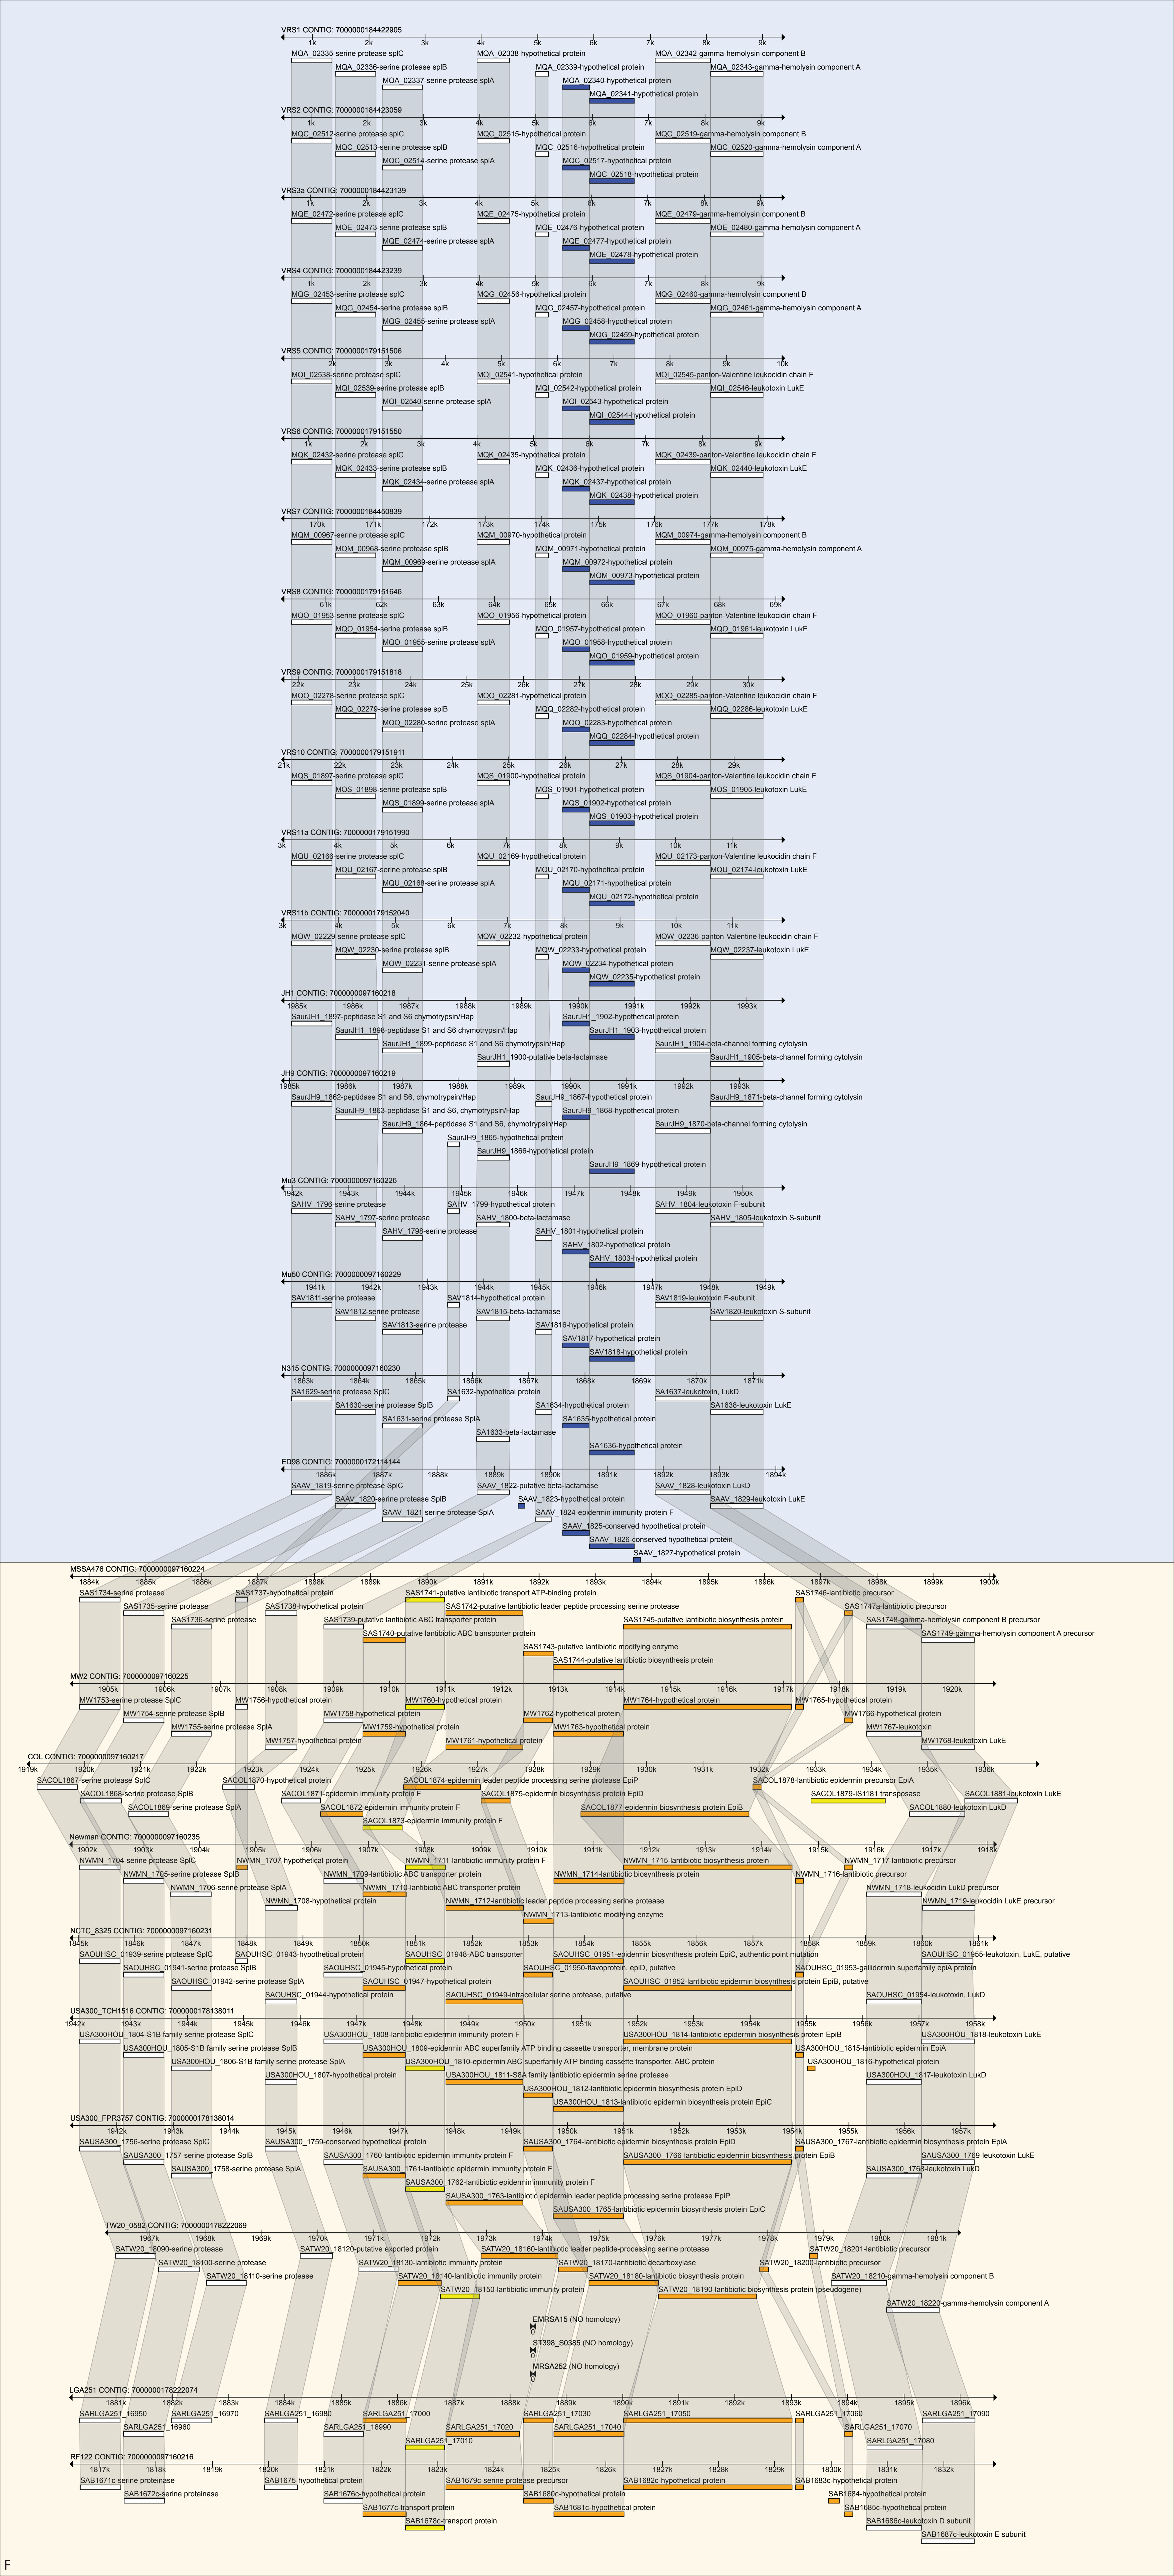

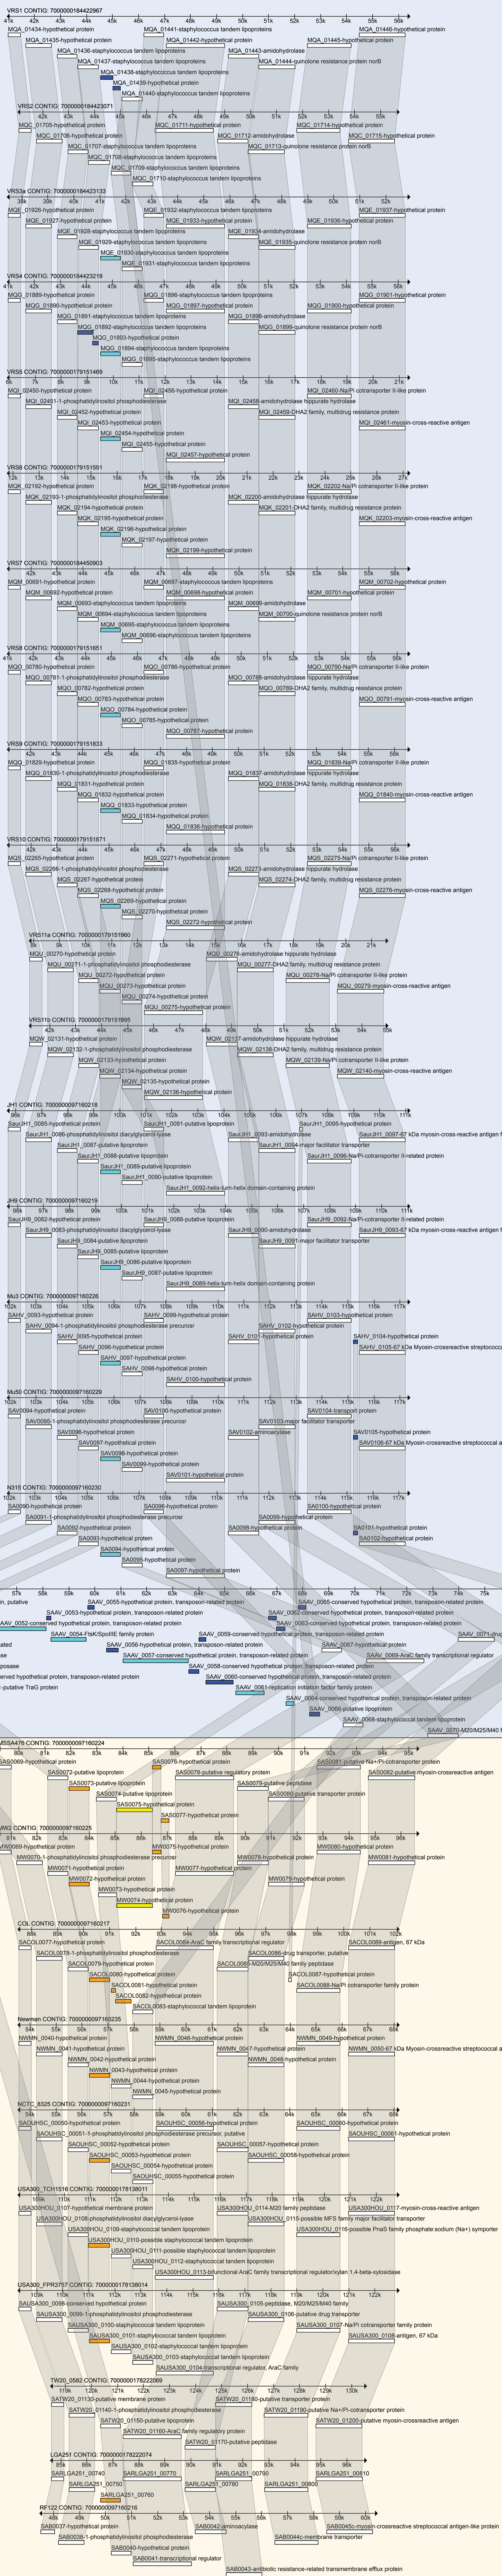

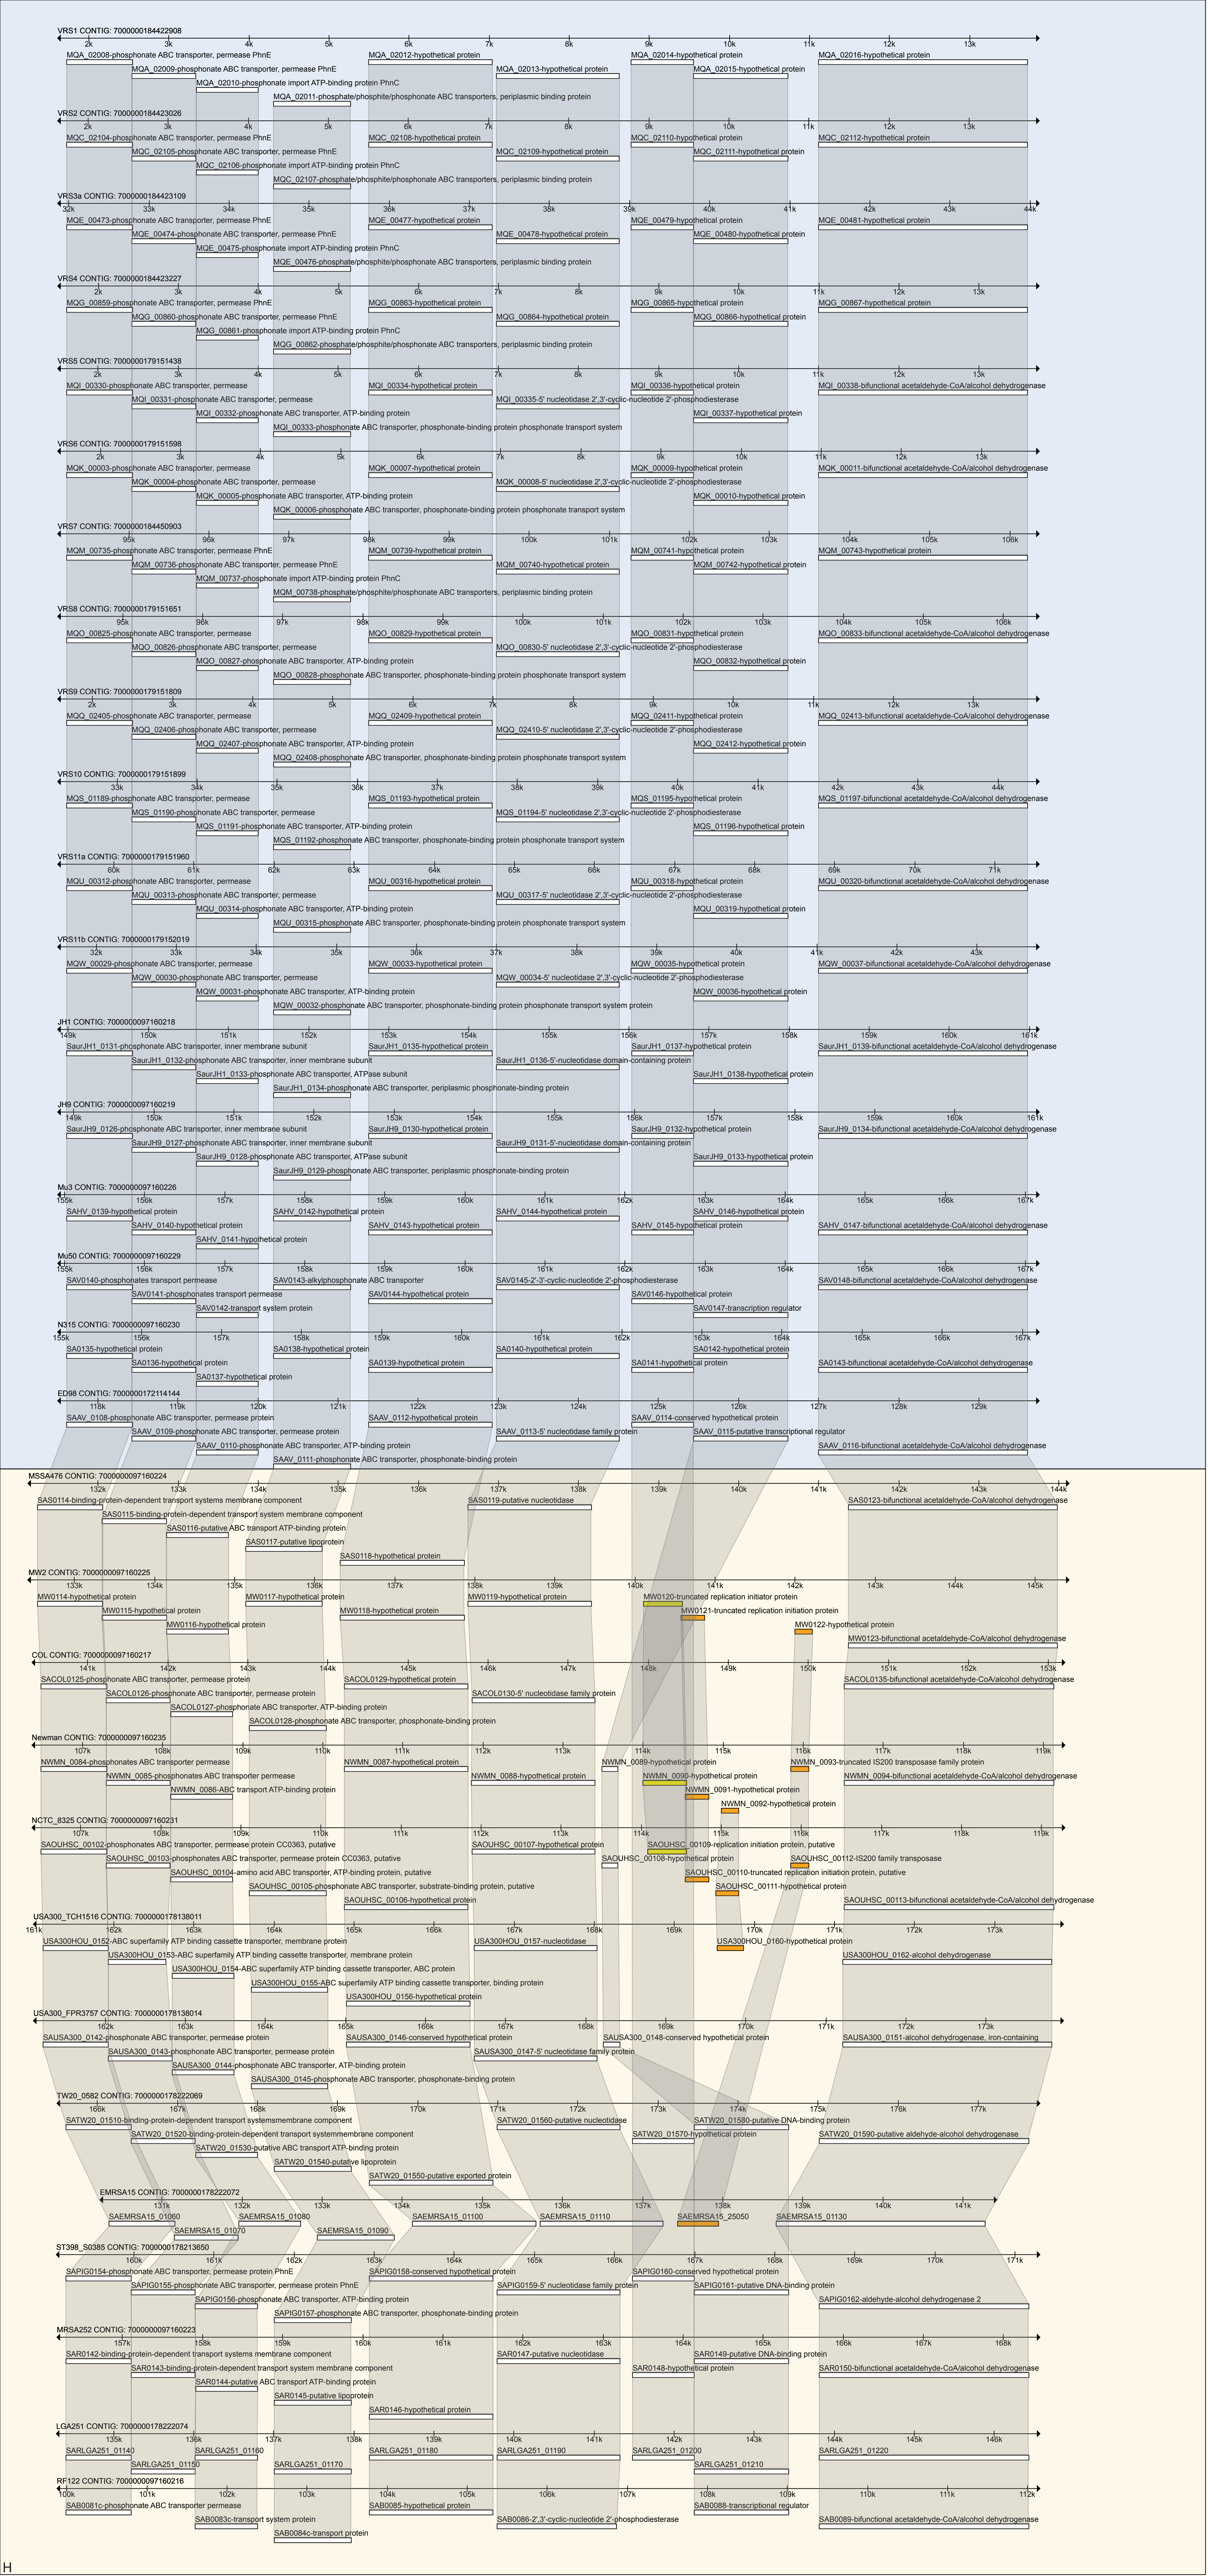



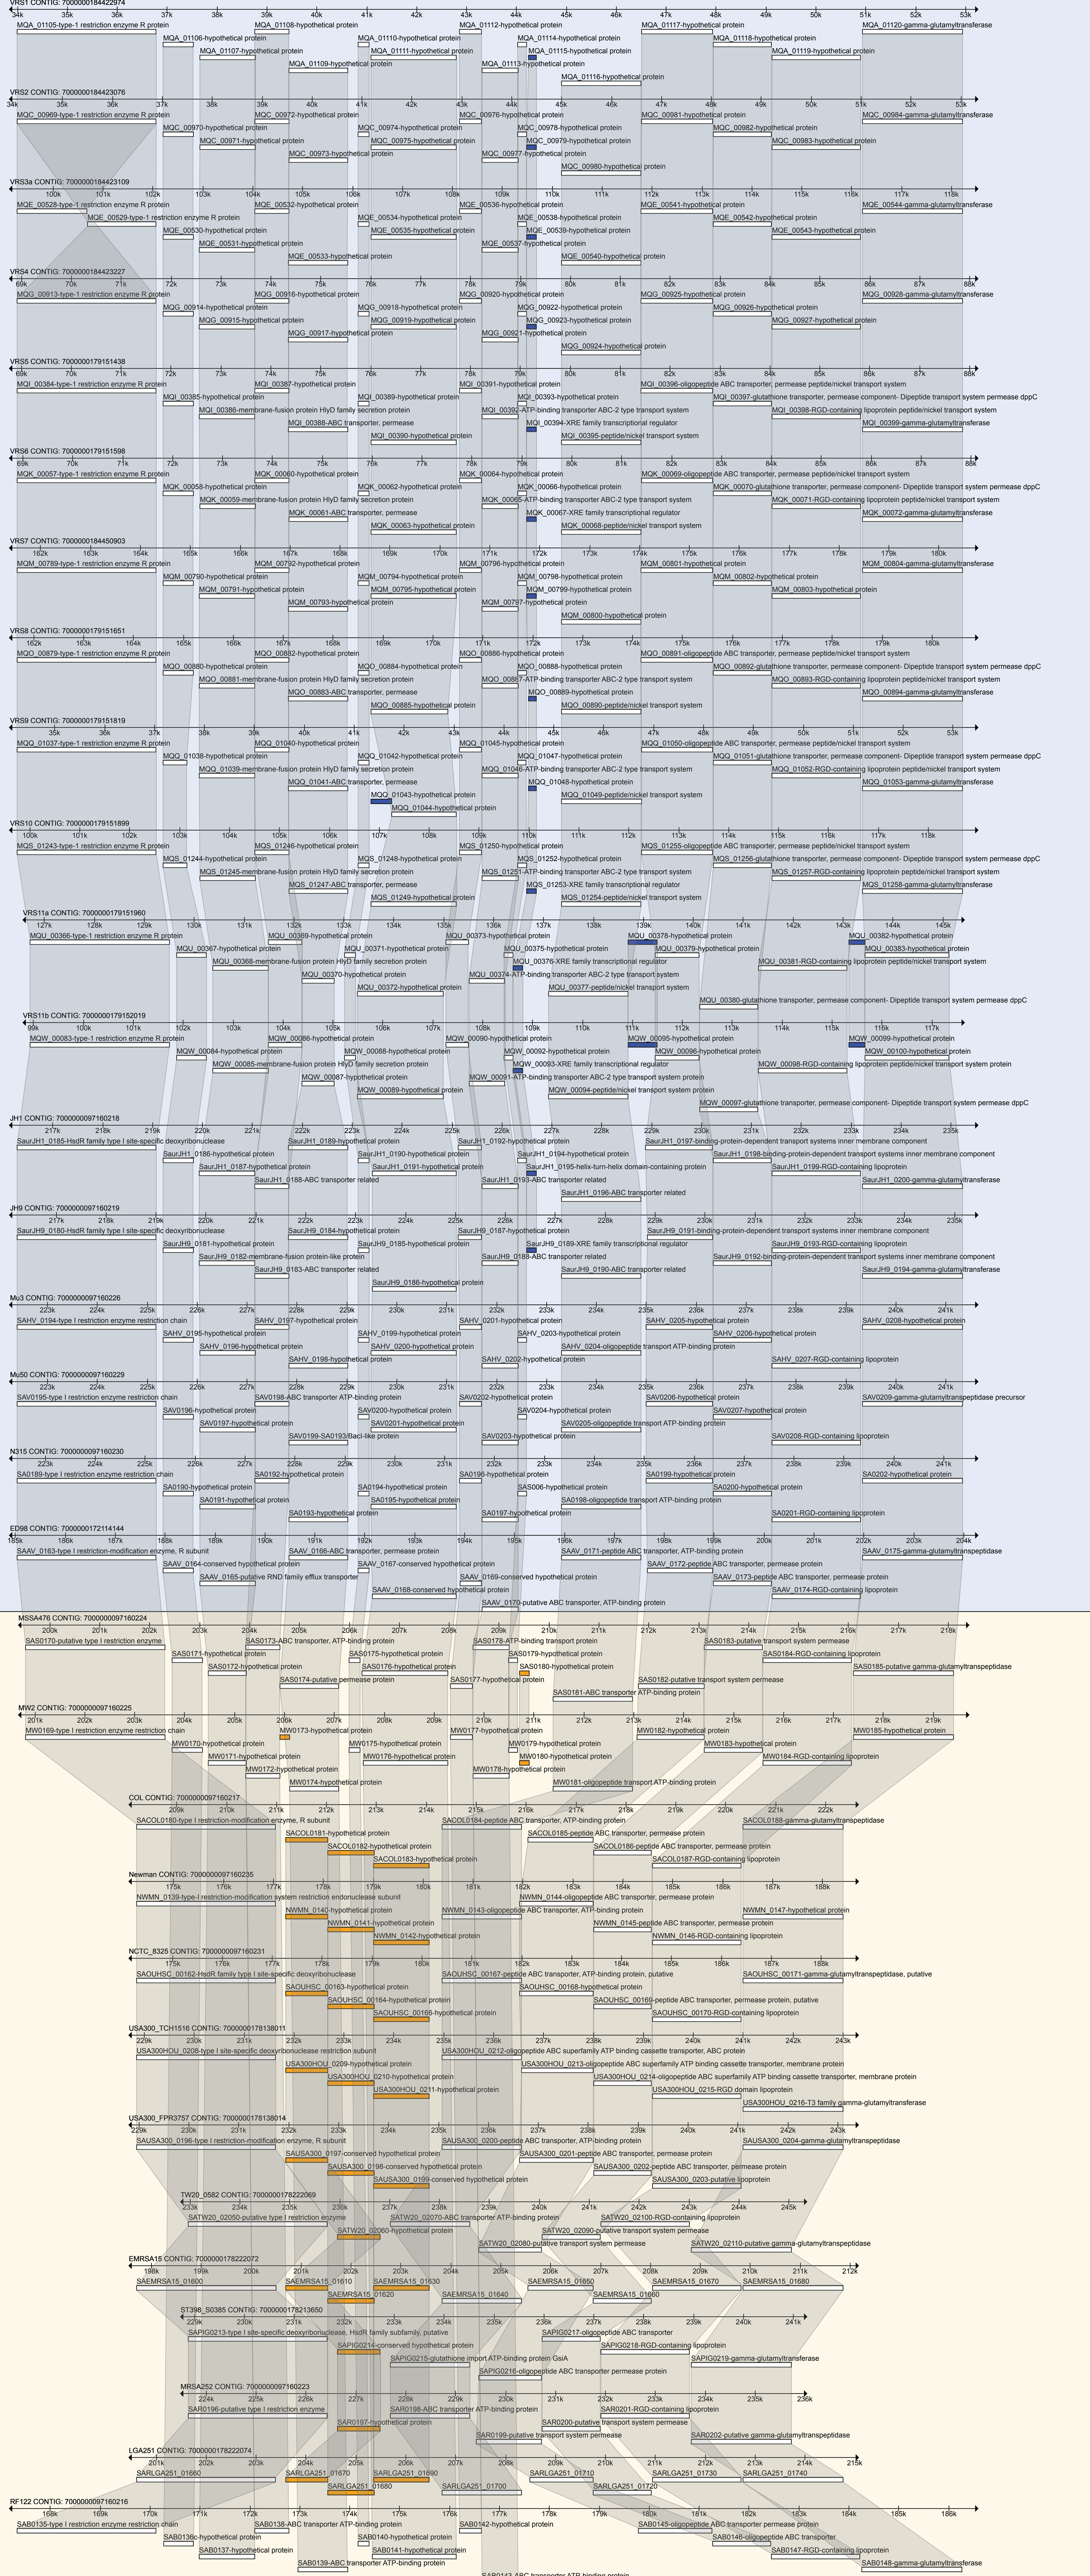

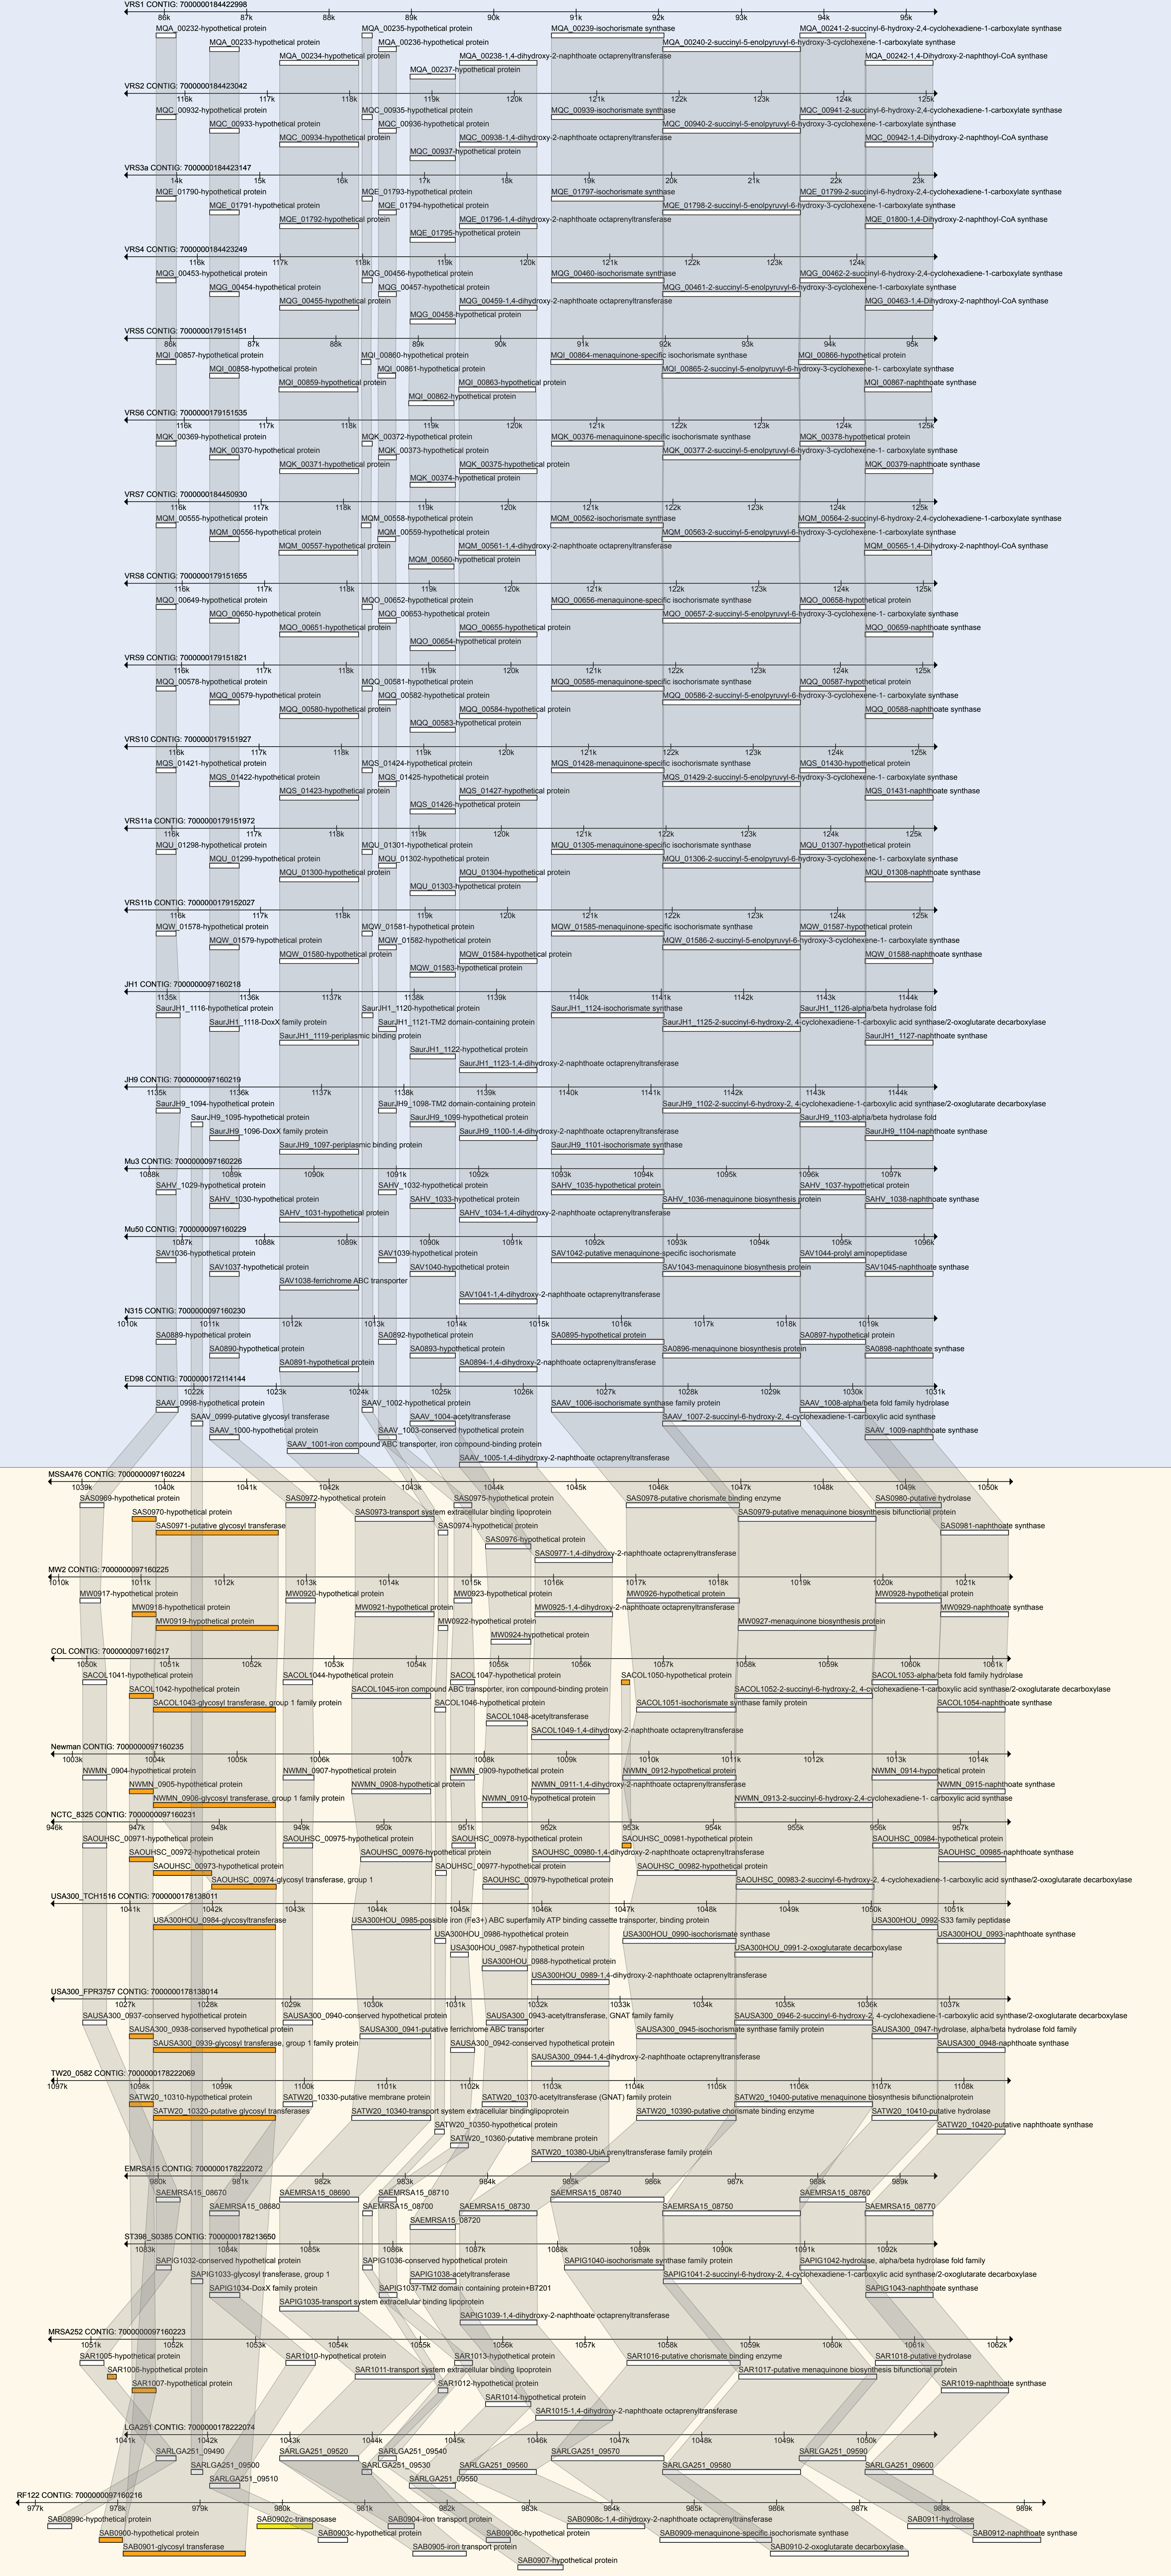

Supplement: mbo003121277sf03.pdf [file mbo003121277sf03.pdf]
